# Supplementary material for: A high-density genetic map reveals variation in recombination rate across the genome of Daphnia magna
Source: PubMed Central journal article supplement (PMC5064971; doi:10.1186/s12863-016-0445-7), 2016-10-13

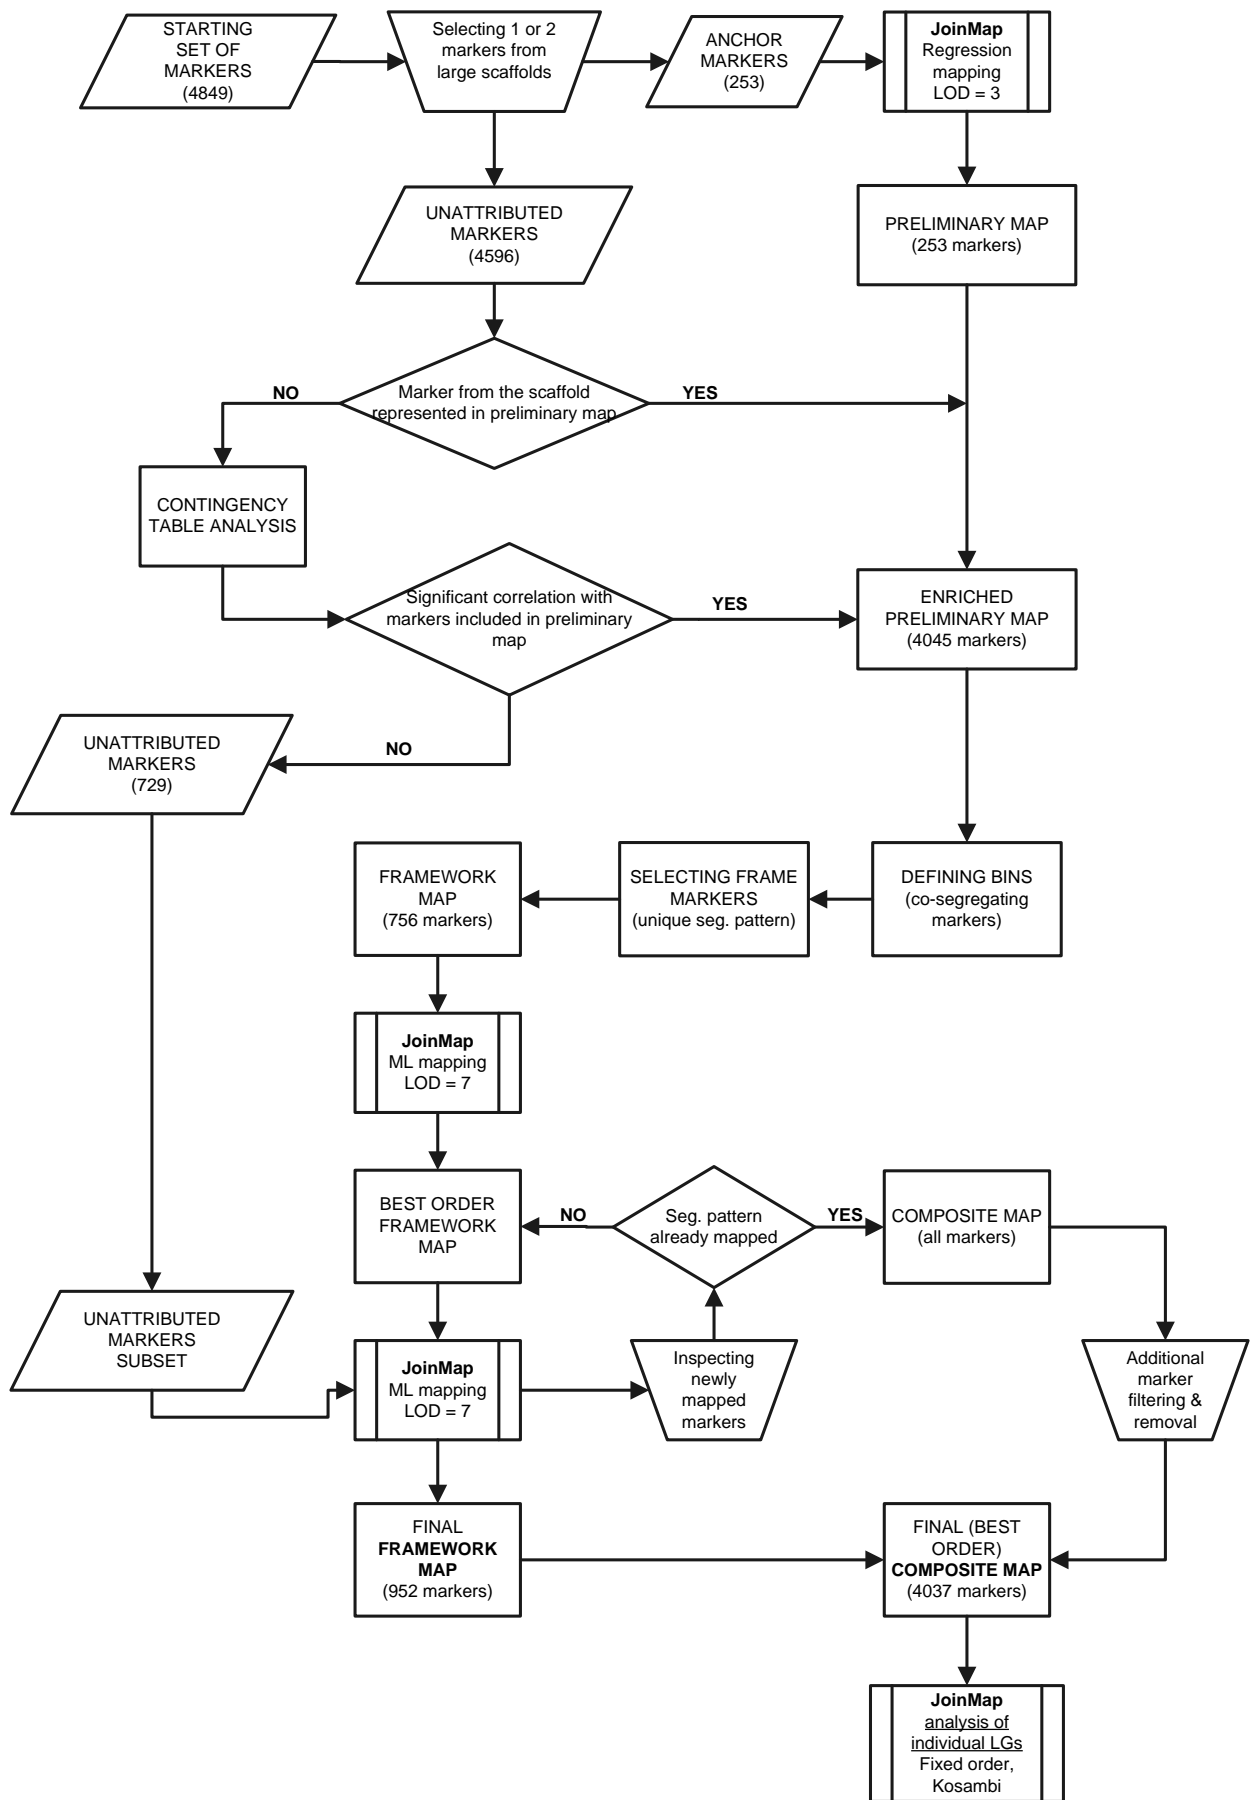

Supplement: 12863_2016_445_MOESM1_ESM.pdf [file 12863_2016_445_MOESM1_ESM.pdf]
